# Supplementary material for: Molecular signatures of cortical expansion in the human foetal brain
Source: PubMed Central journal article supplement (PMC11549424; doi:10.1038/s41467-024-54034-2), 2024-11-08
Supplement: 41467_2024_54034_MOESM2_ESM.pdf [file 41467_2024_54034_MOESM2_ESM.pdf]

## **Description of Additional Supplemental Files**

**Supplemental Data S1:** Reference atlas section numbers and approximate positions

**Supplemental Data S2:** Anatomical groupings for each label set

**Supplemental Data S3:** In situ hybridisation data available for volumetric reconstruction

**Supplemental Data S4:** Anatomical groupings for LMD microarray data

**Supplemental Data S5:** Cell cluster enrichment of genes increasing (up) or decreasing (down) between 15 and 21PCW

**Supplemental Data S6:** Effects of age, region and tissue layer for each gene (n=8771)

**Supplemental Data S7:** ZRT cell type and cell cluster enrichment

**Supplemental Data S8:** ZRT geneset enrichment from WebGestalt

**Supplemental Data S9:** ZRT gene identities

**Supplemental Data S10:** ZRT associations with cortical and neocortical scaling

**Supplemental Data S11:** Cell type enrichment of ZRT\_neo genes at 15 and 21PCW

**Supplemental Data S12:** Enrichment of ZRT genes near to open chromatin regions (OCR)
